# Supplementary material
Source: Elsevier journal article supplement (https://www.sciencedirect.com/science/article/pii/S2254887420301247)
Supplement: mmc3 [file S2254887420301247:mmc3.pdf]

**Tabla S1.** Recomendaciones y grado de consenso

| Recomendaciones                                                                                                                                                                                                   | Primera ronda Delphi            |   |    |                      |    |              | Segunda ronda Delphi           |   |   |                      |    |        | Consenso final<br>y fuerza de la<br>recomendación |
|-------------------------------------------------------------------------------------------------------------------------------------------------------------------------------------------------------------------|---------------------------------|---|----|----------------------|----|--------------|--------------------------------|---|---|----------------------|----|--------|---------------------------------------------------|
|                                                                                                                                                                                                                   | Número de panelistas<br>(n=105) |   |    | Grado de<br>consenso |    |              | Número de panelistas<br>(n=95) |   |   | Grado de<br>consenso |    |        |                                                   |
| Bloque I. Identificación de los pacientes                                                                                                                                                                         |                                 |   |    |                      |    |              |                                |   |   |                      |    |        |                                                   |
| 1. En el momento del ingreso, y de forma repetida durante la hospitalización, deben evaluarse las necesidades de cuidados paliativos de cada paciente.                                                            | 1                               | 1 | 8  | 17                   | 78 | Fuerte       |                                |   |   |                      |    |        | Fuerte                                            |
| 2. En el momento del ingreso, y de forma repetida durante la hospitalización, deben identificarse a los pacientes en situación de sus últimos días de vida.                                                       | 1                               | 0 | 3  | 6                    | 95 | Fuerte       |                                |   |   |                      |    |        | Fuerte                                            |
| 3. Para evaluar las necesidades de cuidados paliativos e identificar a los pacientes en sus últimos días de vida es recomendable utilizar instrumentos y escalas validadas.                                       | 1                               | 2 | 19 | 38                   | 45 | Discrepancia | 0                              | 3 | 9 | 33                   | 50 | Débil  | Débil                                             |
| 4. La condición de enfermo que precisa cuidados paliativos o en situación de últimos días de vida se debe registrar en la historia clínica.                                                                       | 1                               | 0 | 0  | 7                    | 97 | Fuerte       |                                |   |   |                      |    |        | Fuerte                                            |
| Bloque II. Conocimiento, valores y preferencias del paciente                                                                                                                                                      |                                 |   |    |                      |    |              |                                |   |   |                      |    |        |                                                   |
| 5. En los pacientes con enfermedades en situación avanzada que ingresan en el hospital hay que evaluar su conocimiento de la enfermedad y explorar sus valores y preferencias.                                    | 0                               | 1 | 3  | 17                   | 84 | Fuerte       |                                |   |   |                      |    |        | Fuerte                                            |
| 6. Hay que evaluar el conocimiento de la enfermedad y explorar los valores y preferencias de los familiares de pacientes con enfermedades en situación avanzada que ingresan en el hospital.                      | 1                               | 0 | 9  | 28                   | 67 | Fuerte       |                                |   |   |                      |    |        | Fuerte                                            |
| 7. Hay que registrar en la historia clínica el conocimiento de la enfermedad, los valores y preferencias de los pacientes con enfermedades en situación avanzada que ingresan en el hospital y de sus familiares. | 0                               | 1 | 0  | 19                   | 85 | Fuerte       |                                |   |   |                      |    |        | Fuerte                                            |
| 8. Hay que consultar el registro de voluntades/directrices anticipadas cuando ingresa en el hospital un paciente con enfermedad en situación avanzada.                                                            | 1                               | 1 | 9  | 18                   | 76 | Débil        | 1                              | 3 | 8 | 20                   | 63 | Débil  | Débil                                             |
| 9. Cuando se identifica a un paciente en sus últimos días de vida y no puede expresar su voluntad, hay que consultar el registro de voluntades/directrices anticipadas.                                           | 1                               | 1 | 14 | 6                    | 83 | Débil        | 0                              | 2 | 4 | 8                    | 81 | Fuerte | Fuerte                                            |
| Bloque III. Información                                                                                                                                                                                           |                                 |   |    |                      |    |              |                                |   |   |                      |    |        |                                                   |
| 10. En los pacientes en sus últimos días de vida se informará a la familia y a los cuidadores de la situación de muerte cercana.                                                                                  | 1                               | 0 | 1  | 11                   | 92 | Fuerte       |                                |   |   |                      |    |        | Fuerte                                            |
| 11. Es indispensable conocer los límites de confidencialidad establecidos por el paciente durante sus últimos días de vida.                                                                                       | 1                               | 0 | 7  | 13                   | 84 | Fuerte       |                                |   |   |                      |    |        | Fuerte                                            |
| 12. Hay que registrar en la historia clínica el proceso de información al paciente y a sus familiares.                                                                                                            | 1                               | 0 | 1  | 9                    | 94 | Fuerte       |                                |   |   |                      |    |        | Fuerte                                            |
| 13. La información al paciente y a sus familiares se proporcionará manteniendo la intimidad y privacidad.                                                                                                         | 1                               | 0 | 0  | 8                    | 96 | Fuerte       |                                |   |   |                      |    |        | Fuerte                                            |
| 14. Los servicios dispondrán de un despacho de información y de tiempos apropiados para la comunicación con el paciente y la familia.                                                                             | 1                               | 1 | 2  | 13                   | 88 | Fuerte       |                                |   |   |                      |    |        | Fuerte                                            |
| Bloque IV. Necesidades del paciente                                                                                                                                                                               |                                 |   |    |                      |    |              |                                |   |   |                      |    |        |                                                   |
| 15. En los pacientes en sus últimos días de vida hay que evaluar y registrar en la historia clínica la presencia de síntomas y el grado de control de los mismos.                                                 | 1                               | 0 | 0  | 10                   | 94 | Fuerte       |                                |   |   |                      |    |        | Fuerte                                            |
| 16. Todos los servicios deben tener un protocolo actualizado de tratamiento paliativo y de últimos días, orientado al confort y control de síntomas.                                                              | 1                               | 1 | 6  | 21                   | 76 | Fuerte       |                                |   |   |                      |    |        | Fuerte                                            |

|                                                                                                                                                                                                                                                                                                                                                                                                                                      |   |   |    |    |    |        |   |   |    |    |    |        |        |
|--------------------------------------------------------------------------------------------------------------------------------------------------------------------------------------------------------------------------------------------------------------------------------------------------------------------------------------------------------------------------------------------------------------------------------------|---|---|----|----|----|--------|---|---|----|----|----|--------|--------|
| 17. La limitación del esfuerzo terapéutico debe ser compartida por el equipo asistencial y consensuada con el paciente y/o su familia.                                                                                                                                                                                                                                                                                               | 1 | 2 | 3  | 13 | 86 | Fuerte |   |   |    |    |    |        | Fuerte |
| 18. La limitación del esfuerzo terapéutico se registrará en la historia clínica.                                                                                                                                                                                                                                                                                                                                                     | 1 | 0 | 0  | 7  | 97 | Fuerte |   |   |    |    |    |        | Fuerte |
| 19. En los pacientes en sus últimos días de vida se evitarán todos los exámenes y procedimientos diagnósticos que no aporten confort al enfermo.                                                                                                                                                                                                                                                                                     | 1 | 0 | 2  | 5  | 97 | Fuerte |   |   |    |    |    |        | Fuerte |
| 20. En los pacientes en sus últimos días de vida se valorará la conveniencia de las órdenes de no reanimación cardiopulmonar y se registrarán en la historia clínica.                                                                                                                                                                                                                                                                | 1 | 0 | 0  | 6  | 98 | Fuerte |   |   |    |    |    |        | Fuerte |
| 21. En los pacientes en sus últimos días de vida se valorarán las necesidades espirituales del enfermo y la familia.                                                                                                                                                                                                                                                                                                                 | 0 | 1 | 6  | 14 | 84 | Fuerte |   |   |    |    |    |        | Fuerte |
| <b>Bloque V. Atención y cuidados</b>                                                                                                                                                                                                                                                                                                                                                                                                 |   |   |    |    |    |        |   |   |    |    |    |        |        |
| 22. Los pacientes en sus últimos días de vida se atenderán preferentemente en una habitación individual.                                                                                                                                                                                                                                                                                                                             | 1 | 1 | 9  | 17 | 77 | Débil  | 0 | 0 | 4  | 14 | 77 | Fuerte | Fuerte |
| 23. Se facilitará el acompañamiento familiar de los pacientes en sus últimos días de vida.                                                                                                                                                                                                                                                                                                                                           | 1 | 0 | 0  | 9  | 95 | Fuerte |   |   |    |    |    |        | Fuerte |
| 24. Todos los pacientes en sus últimos días de vida deben tener un plan de cuidados de enfermería.                                                                                                                                                                                                                                                                                                                                   | 1 | 0 | 1  | 10 | 93 | Fuerte |   |   |    |    |    |        | Fuerte |
| 25. El plan de cuidados de enfermería incluirá al menos los cuidados de la piel, la boca, la alimentación, la eliminación, el patrón respiratorio, el descanso y el manejo del dolor y de otros síntomas de enfermedad terminal.                                                                                                                                                                                                     | 1 | 0 | 1  | 14 | 89 | Fuerte |   |   |    |    |    |        | Fuerte |
| 26. En los pacientes en sus últimos días de vida se efectuará una comunicación estructurada de las transiciones asistenciales (guardias, cambios de turno, fines de semana, vacaciones).                                                                                                                                                                                                                                             | 1 | 0 | 11 | 19 | 74 | Débil  | 0 | 3 | 7  | 22 | 63 | Fuerte | Fuerte |
| 27. En los pacientes en sus últimos días de vida se facilitará el acceso a cuidados religiosos y psicológicos del paciente y la familia.                                                                                                                                                                                                                                                                                             | 0 | 2 | 2  | 17 | 84 | Fuerte |   |   |    |    |    |        | Fuerte |
| <b>Bloque VI. Sedación paliativa</b>                                                                                                                                                                                                                                                                                                                                                                                                 |   |   |    |    |    |        |   |   |    |    |    |        |        |
| 28. En los pacientes en sus últimos días de vida con síntomas refractarios se valorará la necesidad de sedación paliativa.                                                                                                                                                                                                                                                                                                           | 1 | 0 | 2  | 5  | 97 | Fuerte |   |   |    |    |    |        | Fuerte |
| 29. El paciente otorgará, bien de modo verbal o en documento escrito el consentimiento para la sedación paliativa. Si el paciente no es competente, y actuando por este orden, se consultará el registro de instrucciones previas, se valorarán los deseos previamente expresados del paciente a su familia o allegados, y en su ausencia se pactará la sedación con la familia, siempre quedando registrado en la historia clínica. | 0 | 1 | 6  | 19 | 79 | Fuerte |   |   |    |    |    |        | Fuerte |
| 30. La indicación de la sedación paliativa debe ser compartida por el equipo terapéutico.                                                                                                                                                                                                                                                                                                                                            | 0 | 3 | 7  | 13 | 82 | Fuerte |   |   |    |    |    |        | Fuerte |
| 31. Todos los servicios deben tener un protocolo de sedación paliativa.                                                                                                                                                                                                                                                                                                                                                              | 0 | 2 | 9  | 17 | 77 | Débil  | 0 | 2 | 8  | 16 | 69 | Fuerte | Fuerte |
| 32. El protocolo de sedación paliativa incluirá las indicaciones, los síntomas refractarios a aliviar, los fármacos, las dosis de inducción, mantenimiento y rescate y la monitorización del nivel de sedación.                                                                                                                                                                                                                      | 1 | 0 | 4  | 14 | 86 | Fuerte |   |   |    |    |    |        | Fuerte |
| 33. Para monitorizar el nivel de sedación se utilizará la escala de Ramsay u otra similar.                                                                                                                                                                                                                                                                                                                                           | 1 | 1 | 8  | 30 | 65 | Fuerte |   |   |    |    |    |        | Fuerte |
| 34. Todas las circunstancias que rodean a la sedación paliativa se registrarán en la historia clínica.                                                                                                                                                                                                                                                                                                                               | 1 | 1 | 1  | 14 | 88 | Fuerte |   |   |    |    |    |        | Fuerte |
| <b>Bloque VII. Atención tras la muerte</b>                                                                                                                                                                                                                                                                                                                                                                                           |   |   |    |    |    |        |   |   |    |    |    |        |        |
| 35. Todos los servicios tendrán un protocolo de cuidados <i>post mortem</i> del cadáver.                                                                                                                                                                                                                                                                                                                                             | 2 | 1 | 8  | 22 | 72 | Débil  | 1 | 0 | 6  | 19 | 69 | Fuerte | Fuerte |
| 36. Tras la muerte del paciente se proporcionará atención al duelo inmediato de los familiares.                                                                                                                                                                                                                                                                                                                                      | 3 | 1 | 9  | 26 | 66 | Débil  | 1 | 2 | 13 | 29 | 50 | Débil  | Débil  |
| 37. Antes y después de la muerte se identificarán y derivarán las situaciones de riesgo de duelo complicado.                                                                                                                                                                                                                                                                                                                         | 1 | 1 | 13 | 25 | 65 | Débil  | 0 | 0 | 11 | 26 | 58 | Débil  | Débil  |
